# Supplementary material for: Web-Based Medical Service: Technology Attractiveness, Medical Creditability, Information Source, and Behavior Intention
Source: PubMed Central journal article supplement (PMC5559646; doi:10.2196/jmir.8114), 2017-08-02
Supplement: jmir_v19i8e285_app3.pdf [file jmir_v19i8e285_app3.pdf]

### Question items used in this study

| Constructs            | Items | Measure                                                                                | source                                |
|-----------------------|-------|----------------------------------------------------------------------------------------|---------------------------------------|
| Perceived usefulness  | PU1   | Using WBMS can enhance my effectiveness in self-health management                      | Davis (1989)                          |
|                       | PU2   | Using WBMS can improve self-health management of patients with cardiovascular diseases |                                       |
|                       | PU3   | I think WBMS can improve the quality of medical treatment                              |                                       |
|                       | PU4   | I though 24 hours medical consultation is useful                                       |                                       |
| Perceived ease of use | PEOU1 | It is easy for me to become skillful in using WBMS                                     | Davis (1989)                          |
|                       | PEOU2 | Using WBMS can make self-health management easier                                      |                                       |
|                       | PEOU3 | Measuring physical data and upload is a simple medical service                         |                                       |
|                       | PEOU4 | Although I do not use the WBMS before, but I think it is very simple                   |                                       |
| Medical credibility   | PMP1  | I think WBMS is very professional, it diagnose heart disease by daily data             | Ajzen (2002) and Gefen et al., (2003) |
|                       | PMP2  | I trust and confidence on the professional service                                     |                                       |
|                       | PMP3  | I think the instruments of WBMS service is accurately                                  |                                       |
|                       | PMP4  | I think WBMS is a professional new-innovative medical service                          |                                       |
| Behavior intention    | BI 1  | Listening to the commentary, I am willing to use.                                      | Davis (1989)                          |
|                       | BI 2  | Listening to the commentary, I am willing to recommend to other people.                |                                       |
